## Bionic 3D printed corals

2 Daniel Wangpraseurt<sup>1,2,3§</sup>, Shangting You<sup>4</sup>, Farooq Azam<sup>2</sup>, Gianni Jacucci<sup>1</sup>, Olga Gaidarenko<sup>2</sup>, Mark Hildebrand<sup>2+</sup>,  
Michael Kühl<sup>3,5</sup>, Alison G. Smith<sup>6</sup>, Matthew P. Davey<sup>6</sup>, Alyssa Smith<sup>1</sup>, Dimitri D. Deheyn<sup>2</sup>, Shaochen Chen<sup>4§#</sup>,  
4 Silvia Vignolini<sup>1§#</sup>

<sup>1</sup>Bioinspired Photonics Group, Department of Chemistry, University of Cambridge, Cambridge, UK

6 <sup>2</sup>Scripps Institution of Oceanography, University of California San Diego, San Diego, USA

<sup>3</sup>Marine Biological Section, Department of Biology, University of Copenhagen, Denmark

8 <sup>4</sup>Department of NanoEngineering, University of California San Diego, USA

<sup>5</sup>Climate Change Cluster, University of Technology Sydney, Australia

10 <sup>6</sup>Department of Plant Sciences, University of Cambridge, UK

+author passed away # shared senior author

12 <sup>§</sup>Correspondence to: [dw527@cam.ac.uk](mailto:dw527@cam.ac.uk), [sv319@cam.ac.uk](mailto:sv319@cam.ac.uk) or [chen168@eng.ucsd.edu](mailto:chen168@eng.ucsd.edu)

**Summary: Symbiotic corals have evolved as a highly optimised photon augmentation system leading to space-efficient microalgal growth and photosynthetic quantum efficiencies that approach theoretical limits<sup>1-3</sup>. Corals are characterized by an elastic animal tissue hosting microalgae and a light scattering calcium carbonate skeleton that maximizes light delivery towards otherwise shaded algal-containing tissues<sup>4,5</sup>. Rapid light attenuation due to algal self-shading is a key limiting factor for the upscaling of microalgal cultivation<sup>6,7</sup>. Coral-inspired light management systems could overcome this limitation and facilitate scalable bioenergy and bioproduct generation<sup>8,9</sup>. Here, we developed 3D printed bionic corals capable of growing various types of microalgae with cell densities approaching  $10^9$  cells mL<sup>-1</sup>, up to 100 times greater than in liquid culture. The hybrid photosynthetic biomaterials are produced with a new 3D bioprinting platform which mimics morphological features of living coral tissue and the underlying skeleton with micron resolution, including their optical and mechanical properties. The programmable synthetic microenvironment thus allows for replicating both structural and functional traits of the coral-algal symbiosis. Our work defines a new class of bionic materials capable of interacting with living organisms, that can be exploited for the design of next generation photobioreactors<sup>7</sup> and disruptive approaches for coral reef conservation<sup>10</sup>.**

30 Our bioprinting platform is capable of 3D printing optically-tunable photosynthetic  
matter that mimics coral tissue and skeleton morphology with micron-scale precision (Fig. 1a-g).  
32 In principle, our technique allows replication of any coral architecture (Extended Data Fig. 1),  
providing a variety of design solutions for augmenting light propagation. Fast-growing corals of  
34 the family *Pocilloporidae* are particularly relevant for studying light management. Despite high  
algal cell densities in their tissues ( $1 \times 10^6$  cells per  $\text{cm}^2$  surface area), the internal fluence rate  
36 distribution is homogenous, avoiding self-shading of the symbiotic microalgae<sup>11</sup>. The photon  
distribution is mainly managed by the aragonite skeleton, where light leaks out of the skeleton  
38 and into coral tissue, supplying photons deep within the corallite<sup>4,12</sup>. Additionally, light can enter  
the coral tissue more easily than it can escape, as low angle upwelling light is trapped by  
40 refractive index mismatches between the coral tissue and the surrounding seawater<sup>13</sup>. We  
therefore mimicked these light management strategies and designed a bionic coral for enhanced  
42 microalgal light absorption and growth.

To precisely control the scattering properties of the bio-inspired artificial tissue and  
44 skeleton, we developed a 2-step continuous light projection-based approach for multilayer 3D  
bioprinting (Methods). Optimization of the printing approach required a delicate balance  
46 between several parameters including printability (resolution and mechanical support), cell  
survival, and optical performance (Methods). The artificial coral tissue constructs were  
48 fabricated with a novel bio-ink solution, in which the symbiotic microalgae (*Symbiodinium sp.*)  
were mixed with a photopolymerizable gelatin-methacrylate (GelMA) hydrogel and cellulose-  
50 derived nanocrystals (CNC), the latter providing mechanical stability and allowed tuning of the  
tissue scattering properties<sup>14,15</sup>. Similarly, the artificial skeleton was 3D printed with a  
52 polyethylene glycol diacrylate-based polymer (PEGDA)<sup>16</sup> doped with CNC.

Based on optimization via experiments and optical simulations (Fig. 2), the functional  
54 unit of the artificial skeleton was an abiotic cup structure, shaped like the inorganic calcium  
carbonate corallite (1 mm in diameter and depth) and tuned to redistribute photons via broadband  
56 diffuse light scattering (scattering mean free path = 3 mm between 450-650 nm) and a near  
isotropic angular distribution of scattered light (Fig. 2h, Extended data Fig. 2), similar to the  
58 optical properties of the skeleton of fast growing intact corals<sup>5,12</sup>. The coral-inspired tissue had  
cylinder-like constructs (200  $\mu\text{m}$  wide and 1mm long) radially arranged along the periphery of  
60 the corallites mimicking coral tentacles, which serve to enhance surface area exposed to light<sup>17</sup>

(Fig. 2a). We designed the bionic coral tissue to have a forward scattering cone (Fig. 2h), which enabled light to reach the diffusely backscattering skeleton (Fig. 2a).

Our bionic coral increased the photon residence time as light travelled through the algal culture (Fig. 2e), consequently enhancing the chance of light absorption for photosynthesis by algae deeper within it<sup>13</sup>. As photons travelled through the bionic skeletal cup, they were redirected into the photosynthetic tissue and the contribution of such scattered light increased with depth, effectively delivering light to the deepest part of the bionic coral (Fig. 2i). This photon augmentation strategy led to a steady increase of irradiance with tissue depth, which counter balanced the exponential light attenuation by photopigment absorption (Fig. 2g)<sup>18</sup>. Compared to a flat slab of biopolymer (GelMA) with the same microalgal density ( $5.0 \times 10^6$  cells  $\text{mL}^{-1}$ ), the fluence rate (for 600 nm light) measured in the photosynthetic layer of the bionic coral was more than 1.5-fold enhanced at 750  $\mu\text{m}$  depth (Fig. 2i,j).

In order to evaluate the growth of a commercially-relevant microalgal species in our bionic coral, we cultured the green alga *Marinichlorella kaistiae* KAS603<sup>19</sup> (Fig. 3a-d, Methods). Although the main focus of our bionic coral design was to improve light management, it also allows for growing microalgae without the need for energy-intensive turbulent flow and mixing, which is otherwise required for optimal nutrient and light delivery in photobioreactors<sup>6</sup>. This is accomplished by the combination of the bionic tissue and skeleton replica morphology, the tissue mechanical properties (average Young's modulus,  $E = 4.3$  kPa, Extended Data Fig. 4) and its porosity (pore size diameter = 5-40  $\mu\text{m}$ ) (Methods). We grew *M. kaistiae* KAS603 under no-flow conditions and low incident irradiance ( $E_d = 80$   $\mu\text{mol photons m}^{-2} \text{ s}^{-1}$ ) in our bionic coral, where it reached algal cell densities of  $>8 \times 10^8$  cells  $\text{mL}^{-1}$  by day 12 (Fig. 3a). This is about one order of magnitude higher than the maximal cell densities reported for this algal species when grown in flasks under continuous stirring<sup>19</sup>. Despite such high algal cell densities, irradiance did not limit growth at depth, and about 80% of the incident irradiance remained at 1 mm depth within the bionic coral tissue construct (Fig. 3b). In comparison, biofilm-based photobioreactors show exponential light attenuation characterized by a virtual depletion of irradiance within 200-300  $\mu\text{m}$  of the biofilm thickness<sup>20</sup>. We observed that *M. kaistiae* KAS603 grew in the bionic tissue as dense aggregates (sphericity  $0.75 \pm 0.09$  SD, diameter = 30-50  $\mu\text{m}$ ; Fig. 4a-d). Algal photosynthesis within the tissue construct yielded a net photosynthetic  $\text{O}_2$  production of 0.25  $\text{nmol O}_2 \text{ cm}^{-2} \text{ s}^{-1}$  at the polyp tissue surface (Fig. 3c). Gross photosynthesis within 8-day old

92 bionic coral polyps was enhanced at a depth of 300  $\mu\text{m}$  compared to gross photosynthesis rates  
measured at the surface of the bionic coral tissue (Fig. 3d).

94 Bionic corals enable microalgal cultivation with strongly reduced energy maintenance  
requirements, as they do not require water mixing and the fluence rate within the biomaterial is  
96 up to two-fold enhanced relative to the incident light source (Methods, Fig. 2i,j). The light  
redistribution in the bionic corals can be controlled by adjusting the concentration and  
98 dimensions of the CNCs in the biopolymer (Extended Data Fig. 2). This approach allows the  
design of various coral host mimics (Extended Data Fig. 1) accommodating algal strains with  
100 different photon requirements for optimal productivity<sup>21</sup>. Compared to commercial outdoor  
raceway ponds that achieve an aerial productivity of  $\sim 4\text{-}20 \text{ g m}^{-2} \text{ day}^{-1}$ <sup>(21,22)</sup>, our bionic corals, if  
102 scaled appropriately, would use up to 150 times lower volume and achieve approximately  $2.55 \text{ g}$   
 $\text{m}^{-2} \text{ day}^{-1}$  (Methods). The high spatial efficiency of the bionic coral system is therefore  
104 particularly suitable for the design of compact photobioreactors for algal growth in dense urban  
areas or as life support systems for space travel<sup>18,23</sup>. Moreover, bionic corals allow investigation  
106 of the cellular activity of specific *Symbiodinium* strains, while mimicking the natural optical and  
mechanical microenvironment of different corals, providing an invaluable tool for advancing the  
108 frontiers of animal-algal symbiosis and coral bleaching research. We therefore anticipate that  
bionic corals will find multidisciplinary applications from biological studies to commercial  
110 technologies for efficient photon augmentation for bioenergy and bioproducts.

## 112 References

1. Hatcher, B. G. Coral reef primary productivity: a beggar's banquet. *Trends. Ecol. Evol.* **3**,  
114 106-111 (1988).
2. Brodersen, K. E., Lichtenberg, M., Ralph, P. J., K uhl, M., Wangpraseurt, D. Radiative  
116 energy budget reveals high photosynthetic efficiency in symbiont-bearing corals. *J. R.*  
*Soc. Interface* **11**, 20130997 (2014).
- 118 3. Roth, M. S. The engine of the reef: photobiology of the coral–algal symbiosis. *Front.*  
*Microb.* **5**, 422 (2014).
- 120 4. Wangpraseurt, D., Jacques, S. L., Petrie, T., K uhl, M. Monte Carlo modeling of photon  
propagation reveals highly scattering coral tissue. *Front. Plant Sci.* **7**, 1404 (2016).

- 122 5. Enríquez, S., Méndez, E. R., Hoegh-Guldberg, O. Iglesias-Prieto, R. Key functional role  
of the optical properties of coral skeletons in coral ecology and evolution. *Proc. R. Soc.*  
124 *B.* **284**, 20161667 (2017).
- 126 6. Wijffels, R. H., Barbosa, M. J. An outlook on microalgal biofuels. *Science* **329**, 796-799  
(2010).
- 128 7. Ooms, M. D., Dinh, C. T., Sargent, E. H., Sinton, D. Photon management for  
augmented photosynthesis. *Nat. Commun.* **7**, 12699 (2016).
- 130 8. Sanchez, C., Arribart, H., Guille, M. M. G. Biomimetism and bioinspiration as tools for  
the design of innovative materials and systems. *Nat. Mater.* **4**, 277 (2005).
- 132 9. Lode, A., *et al.*, Green bioprinting: Fabrication of photosynthetic algae-laden hydrogel  
scaffolds for biotechnological and medical applications. *Eng. Life Sci.* **15**, 177-183  
(2015).
- 134 10. van Oppen, M. J., Oliver, J. K., Putnam, H. M., Gates, R. D., Building coral reef  
resilience through assisted evolution. *Proc. Natl. Acad. Sci. U.S.A.* **112**, 2307-2313  
136 (2015).
- 138 11. Wangpraseurt, D., *et al.*, *In vivo* microscale measurements of light and photosynthesis  
during coral bleaching: evidence for the optical feedback loop? *Front. Microb.* **8**, 59  
(2017).
- 140 12. Marcelino, L. A., *et al.*, Modulation of light-enhancement to symbiotic algae by light  
scattering in corals and evolutionary trends in bleaching. *PLoS ONE* **8**, e61492 (2013).
- 142 13. Kühl, M., Cohen, Y., Dalsgaard, T., Jørgensen, B. B., Revsbech, N. P.  
Microenvironment and photosynthesis of zooxanthellae in scleractinian corals studied  
144 with microsensors for O<sub>2</sub>, pH and light. *Mar. Ecol. Prog. Ser.* **117**, 159-172 (1995).
- 146 14. Parker, R. M., *et al.*, Hierarchical self-assembly of cellulose nanocrystals in a confined  
geometry. *ACS Nano* **10**, 8443-8449 (2016).
- 148 15. Zhu W. *et al.*, Direct 3D bioprinting of prevascularized tissue constructs with complex  
microarchitecture. *Biomaterials* **124**, 106-115 (2017).
- 150 16. Murphy, S. V., Atala, A. 3D bioprinting of tissues and organs. *Nat. Biotechnol.* **32**, 773  
(2014).

17. Wangpraseurt, D., Wentzel, C., Jacques, S. L., Wagner, M., Kühl, M. *In vivo* imaging of  
152 coral tissue and skeleton with optical coherence tomography. *J. R. Soc. Interface* **14**,  
20161003 (2017).
18. Slade, R., Bauen, A. Micro-algae cultivation for biofuels: cost, energy balance,  
154 environmental impacts and future prospects. *Biomass Bioenergy* **53**, 29-38 (2013).
19. Sánchez-Alvarez, E. L., González-Ledezma, G., Prats, J. A. B. Stephano-Hornedo, J. L.,  
156 Hildebrand, M. Evaluating *Marinichlorella kaistiae* KAS603 cell size variation, growth  
158 and TAG accumulation resulting from rapid adaptation to highly diverse trophic and  
salinity cultivation regimes. *Algal Res.* **25**, 12-24 (2017).
20. Li, T. *et al.*, Microscale profiling of photosynthesis-related variables in a highly  
160 productive biofilm photobioreactor. *Biotechnol. Bioeng.* **113**, 1046-1055 (2016).
21. Brennan, L., Owende, P. Biofuels from microalgae—a review of technologies for  
162 production, processing, and extractions of biofuels and co-products. *Renew. Sust. Energ.*  
164 *Revi.* **14**, 557-577 (2010).
22. Hase, R., Oikawa, H., Sasao, C., Morita, M., Watanabe, Y. Photosynthetic production of  
166 microalgal biomass in a raceway system under greenhouse conditions in Sendai city. *J.*  
*Biosci. Bioeng.* **89**, 157-163 (2000).
23. Hendrickx, L., Mergeay, M. From the deep sea to the stars: human life support through  
168 minimal communities. *Curr. Opin. Microbiol.* **10**, 231-237 (2007).
24. Liu, J., Hwang, H. H., Wang, P., Whang, G., Chen, S. Direct 3D-printing of cell-laden  
170 constructs in microfluidic architectures. *Lab Chip* **16**, 1430-1438 (2016).
25. Kolesky, D. B. *et al.*, 3D bioprinting of vascularized, heterogeneous cell-laden tissue  
172 constructs. *Adv. Mater.* **26**, 3124-3130 (2014).
26. Guidetti, G., Atifi, S., Vignolini, S., Hamad, W. Y. Flexible photonic cellulose  
174 nanocrystal films. *Adv. Mater.* **28**, 10042-10047 (2016).
27. Zhu, W., *et al.*, Rapid continuous 3D printing of customizable peripheral nerve guidance  
176 conduits. *Mater. Today* **9**, 951-959(2018).
28. Nichol, J. W., *et al.*, Cell-laden microengineered gelatin methacrylate hydrogels.  
178 *Biomaterials* **31**, 5536-5544 (2010).
29. Fairbanks, B. D., Schwartz, M. P., Bowman, C. N., Anseth, K. S. Photoinitiated  
180 polymerization of PEG-diacrylate with lithium phenyl-2, 4, 6-

- 182 trimethylbenzoylphosphinate: polymerization rate and cytocompatibility. *Biomaterials*  
183 **30**, 6702-6707 (2009).
- 184 30. Darley, W.M., Volcani, B. Role of silicon in diatom metabolism: a silicon requirement  
185 for deoxyribonucleic acid synthesis in the diatom *Cylindrotheca fusiformis* Reimann and  
186 Lewin. *Exp. Cell Res.* **58**, 334-342 (1969).
- 187 31. Vignolini, S., Moyroud, E., Glover, B. J., Steiner, U. Analysing photonic structures in  
188 plants. *J. R. Soc. Interface* **10**, 20130394 (2013).
- 189 32. Ishimaru, A. *Wave propagation and scattering in random media*. (John Wiley & Sons,  
190 1999).
- 191 33. Wiersma, D. S., Lagendijk, A. Light diffusion with gain and random lasers. *Phys. Rev. E*  
192 **54**, 4256 (1996).
- 193 34. Vera, M., Durian, D. J. Angular distribution of diffusely transmitted light. *Phys. Rev. E*  
194 **53**, 3215 (1996).
- 195 35. Syurik, J., Jacucci, G., Onelli, O. D., Hölscher, H., Vignolini, S. Bio-inspired highly  
196 scattering networks via polymer phase separation. *Adv. Funct. Mater.*, 1706901 (2018).
- 197 36. Fang, Q., Boas, D. A. Tetrahedral mesh generation from volumetric binary and grayscale  
198 images. *Proceeding of IEEE International Symposium on Biomedical Imaging*  
(Piscataway, NJ) vol. **53**, pp. 1142–1145.
- 199 37. Fang, Q. Mesh-based Monte Carlo method using fast ray-tracing in Plücker coordinates.  
200 *Biomed. Opt. Expr.* **1**, 165-175 (2010).
- 201 38. Jacques, S. L. Optical properties of biological tissues: a review. *Phys Med. Biol.* **58**, R37  
202 (2013).
- 203 39. Zhu, C., Lee, Y. Determination of biomass dry weight of marine microalgae. *J. Appl.*  
204 *Phycol.* **9**, 189-194 (1997).
- 205 40. Revsbech, N. P., Jørgensen, B. B. Photosynthesis of benthic microflora measured with  
206 high spatial-resolution by the oxygen microprofile method - capabilities and limitations  
207 of the method. *Limnol. Oceanogr.* **28**, 749-756 (1983).
- 208 41. Webb, W.L., Newton, M., Starr, D. Carbon dioxide exchange of *Alnus rubra*: a  
209 mathematical model. *Oecologia* **17**, 281–291 (1974).
- 210

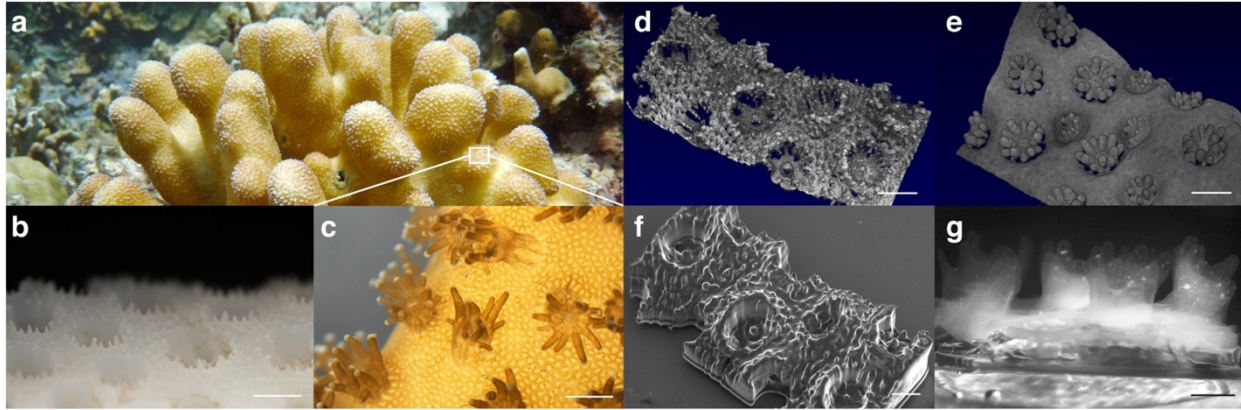

212

**Fig. 1. Structure of natural and 3D printed bionic corals.** Colony of the coral *Stylophora*  
214 *pistilla* growing at about 10 m depth on Watakobi Reef, East Sulawesi, Indonesia (a). Close-up  
photograph (b, c) and optical coherence tomography scanning (d, e) of coral skeleton and coral  
216 tissue, respectively. Scanning electron microscopy image of successful 3D printed skeleton  
replica showing corallites in 1:1 scale relative to the original design (f). Photograph of living  
218 bionic coral growing *Symbiodinium sp.* microalgae (g). The living tissue was printed on top of  
the skeleton mimic and the bionic coral was cultured for 7 days. Scale bar = 1 mm (b-f) and 750  
220  $\mu\text{m}$  (g).



222

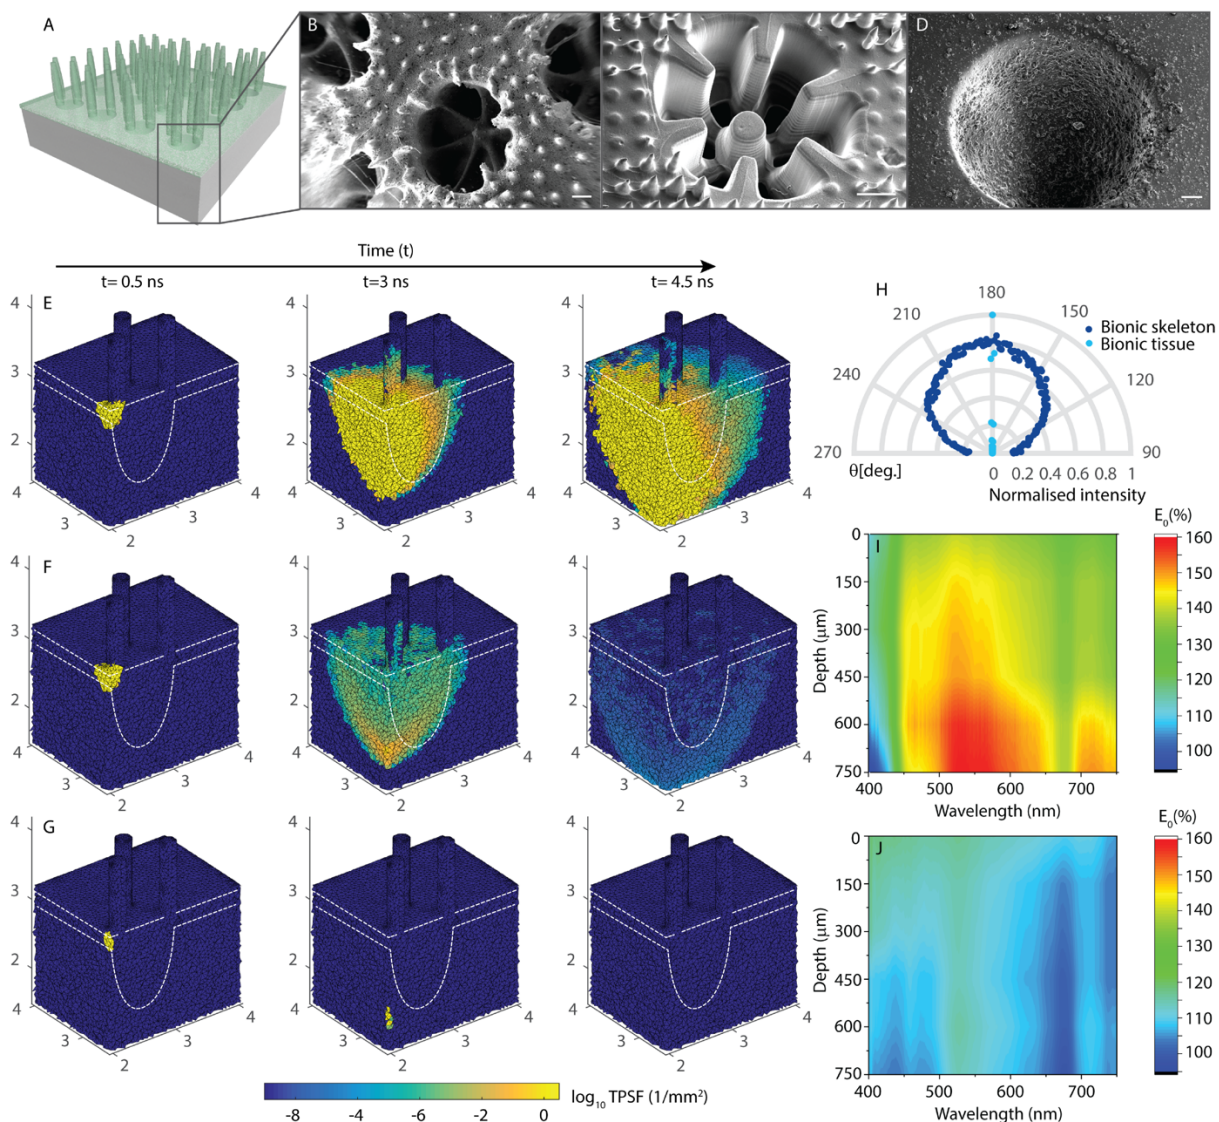

224 **Fig. 2. Optical properties of 3D printed bionic coral tissue and skeleton.** 3D rendering of final bionic  
 226 coral design (a). Bionic skeletal design optimization (b-d) showing SEM images of the original  
 228 *Stylophora pistillata* corallite architecture (scale bar = 200 $\mu\text{m}$ ) (b), a 3D printed intermediate skeleton  
 230 design (scale bar = 300  $\mu\text{m}$ ) (c) and the final bionic skeleton doped with CNC aggregates (scale bar = 100  
 232  $\mu\text{m}$ ) (d). 3D tetrahedral mesh-based Monte Carlo simulation (e-g). Light (675 nm) is irradiated over the  
 234 connecting tissue (red arrow) as a collimated pencil beam. The time-resolved solution of photon  
 236 migration (temporal point spread function, TPSF [ $1/\text{mm}^2$ ]) is shown after 0.5 ns (left column), 3 ns  
 (center column), and 4.5 ns (right column) in a cross-cut view of the 2-layer bionic coral (e), a 1-layer  
 bionic tissue (f) and non-scattering GelMA (g). The microalgal density in the tissue component is  
 identical for all simulations ( $\mu_a=15 \text{ mm}^{-1}$ ). The angular distribution of forward scattered light  
 ( $\theta=270^\circ-90^\circ$ ) at 550 nm is shown as normalized transmittance (h). Microprobe-based fluence rate  
 measurements ( $E_0$  in % of incident irradiance) for the bionic coral (i) and a flat slab of GelMA (j)  
 both with a microalgal density of  $5.0 \times 10^6 \text{ cells mL}^{-1}$ .

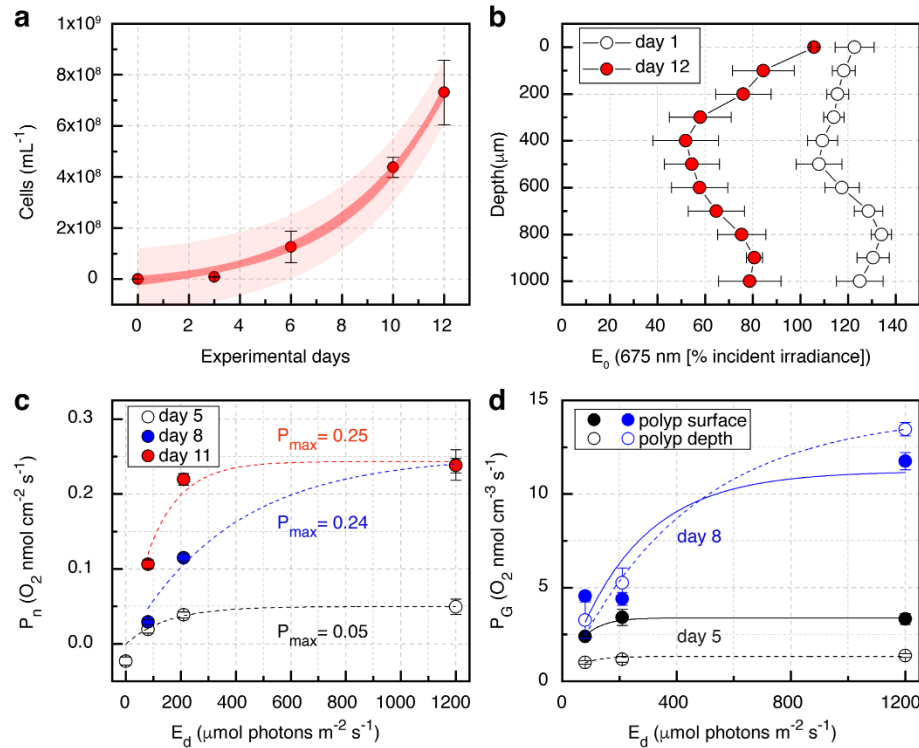

238 **Fig. 3. Performance testing of 3D printed bionic coral.** Growth of *Marinichlorella kaistiae*  
 KAS603 in bionic coral (a). Data are means ( $\pm$  SEM,  $n = 3-6$  bionic coral prints). Dark and  
 240 bright red areas show 95% confidence and prediction intervals, respectively. Vertical attenuation  
 of fluence rate ( $E_0$  at 675 nm) at the beginning (day 1) and end of the performance test (day 12)  
 242 (b). Net photosynthetic rates at day 5, 8 and 11 (c). Lines represent curve fits (see Methods).  
 Gross photosynthetic rates at day 5 (black) and day 8 (blue) (d). Measurements were performed  
 244 with  $O_2$  microsensors at the center of the corallite cup surface (closed symbols/solid lines) and at  
 a vertical depth of 300  $\mu\text{m}$  (open symbols/dashed lines). Symbols are means ( $\pm$  SEM,  $n = 3-6$   
 246 bionic coral prints), lines are curve fits.

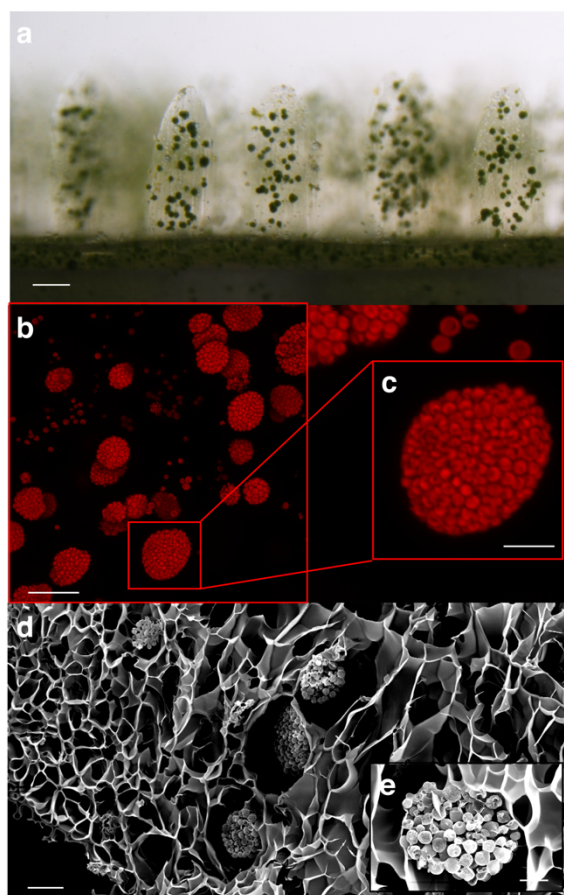

248

**Fig. 4. Living 3D printed bionic coral.** Horizontal view of 7-day old bioprinted construct, showing aggregates of the green microalga *Marinichlorella kaistiae* KAS603 (scale bar = 100  $\mu\text{m}$ ) (a). Maximum z projection of confocal images showing chlorophyll a fluorescence of bionic tentacles (scale bar = 50  $\mu\text{m}$ ) (b) and a *M. kaistiae* KAS603 aggregate (scale bar = 20  $\mu\text{m}$ ) (c). SEM image of bionic tissue showing porous tissue scaffolds (scale bar = 20  $\mu\text{m}$ ) (d) and a close-up of a microalgal aggregate (scale bar = 10  $\mu\text{m}$ ) (e).

250

252

254

## 256 **METHODS**

### **Optical coherence tomography imaging**

258 To create a digital mask of natural coral surfaces, a spectral-domain (SD) optical  
coherence tomography (OCT) system (Ganymede II, Thorlabs GmbH, Dachau, Germany) was  
260 used to image living corals (Extended Data Figure 1). The OCT system was equipped with a  
superluminescent diode (centered at 930 nm) and an objective lens (effective focal length = 36  
262 mm) (LSM03; Thorlabs GmbH, Dachau, Germany) yielding a z-resolution of 4.5  $\mu\text{m}$  and a x-y  
resolution of 8  $\mu\text{m}$  in water. The imaged coral species (*Pavona cactus*, *Stylophora pistillata*,  
264 *Pocillopora damicornis*, *Favites flexuosa*) were maintained at the Centre Scientifique de  
Monaco, and corals were imaged under controlled flow and irradiance conditions. For OCT  
266 imaging of bare coral skeletons, the living tissue was air brushed off the skeleton. The skeleton  
was carefully cleaned before imaging the bare skeleton in water. OCT scanning was performed  
268 as described previously<sup>17</sup>.

### **Surface rendering of OCT data**

270 OCT data was extracted as multiple 16-bit TIFF image stacks and imported into  
MATLAB (Matlab 2018a). Image acquisition noise was removed via 3D median filtering.  
272 Segmentation of the outer tissue or skeletal surface was done via multilevel image thresholding  
using Otsu's method on each image of every TIFF stack. The binary files were exported as *x,y,z*  
274 point clouds and converted to a *stl* file format, which could be sliced into 2D image sequences  
for bioprinting<sup>24</sup>. If the generated *stl* files showed holes in the surface mesh, these holes were  
276 manually filled using *Meshlab* (Meshlab 2016).

### **Algal-biopolymer design optimization**

278 Key characteristics to achieve in material design were 1) high microalgal cell viability  
and growth, 2) microscale printing resolution, and 3) optimization of light scattering and  
280 biomechanical parameters including material stiffness, porosity and molecular diffusion. The  
photo-induced, free radical polymerization mechanism underlying our 3D printing technique  
282 allowed us to precisely control the mechanical properties via modulating the crosslinking density  
of the polymerized parts<sup>27</sup>. Any material and fabrication parameters (e.g., light intensity,  
284 exposure time, photoinitiator concentration, material composition) that affect the crosslinking  
density can be employed to tune the mechanical properties of the printed parts. Initially, different  
286 concentrations of prepolymer and photoinitiator combinations were evaluated, including glycidal

methacrylate-hyaluronic acid (GM-HA), gelatin methacrylate (GelMA), polyethylene glycol  
288 diacrylate (PEGDA), and poly(lactic acid), together with the photoinitiators Irgacure 651 and  
lithium phenyl-2,4,6 trimethylbenzoylphosphinate (LAP). Cell viability and growth were higher  
290 in GelMA compared to PEGDA (data not shown), probably due to favorable diffusion  
characteristics of GelMA because of its highly porous microstructure<sup>25</sup>, while PEGDA has  
292 stronger mechanical stiffness. Therefore, we combined PEGDA with GelMA to make a  
mechanically robust and tunable hydrogel. GelMA was initially doped with graphene oxide,  
294 which enhanced mechanical stability but limited light penetration and cell growth. We developed  
a photopolymerization system using 405 nm light to avoid UV damage to the algae.

To optimize light scattering, we first mixed the hydrogel with different concentrations of  
SiO<sub>2</sub> particles (Sigma-Aldrich, USA) that were in a size range (about 10 μm) to induce  
298 broadband white light scattering with high scattering efficiency. However, when mixed into the  
hydrogels, the SiO<sub>2</sub> particle showed a vertical concentration gradient related to the particle  
300 sinking speed in the gel. Instead, we used cellulose nanocrystals (CNCs), which exhibit suitable  
light scattering, mechanical properties and low mass density<sup>26</sup>. CNCs can be considered as rod-  
302 shaped colloidal particles (typical length of 150 nm and a width of a few nm in diameter), which  
have high refractive index (about 1.55 in the visible range). CNCs have received an increasing  
304 interest in photonics, due to their colloidal behaviour and their ability to self-assemble into  
cholesteric optical films<sup>26</sup>. In the 3D bioprinted coral skeleton samples that contain 7% CNCs  
306 (w/v), we found that CNCs aggregated to form microparticles with a size range of 1-10 μm.  
These aggregated microparticles are highly efficient white light scatterers (Extended Data Fig.  
308 2a). In contrast, the 3D bioprinted bionic coral tissue constructs contained only 0.1% CNCs  
(w/v), and we did not observe any aggregated CNC microparticles.

The printing polymer solution (bio-ink) for the bionic coral tissue constructs was made  
310 up of final concentrations of: *Marinichlorella kaistiae* KAS603 (1x10<sup>6</sup> cells mL<sup>-1</sup>), GelMA (5%  
312 w/v), LAP (0.2 % w/v), food dye (1% v/v), PEGDA (6000 Da; 0.5% w/v), CNC (0.1 % w/v),  
and artificial seawater (ASW; 93.2 %). The yellow food dye (Wilton® Candy Colors) was added  
314 to limit the penetration of polymerization-inducing light into the bio-ink. This leads to higher  
light absorption relative to scattering and enhanced the spatial resolution of the printing<sup>27</sup>. The  
316 food dye is non-toxic and diffuses out after 24 hr (data not shown).

318 **Polymer synthesis**

PEGDA (mol wt,  $M_n = 6000$ ) was purchased from Sigma–Aldrich (USA). GelMA was  
320 synthesized as described previously<sup>28</sup>. Briefly, porcine gelatin (Sigma Aldrich, St. Louis, MO,  
USA) was mixed at 10% (w/v) into ASW medium (see above) and stirred at 60°C until fully  
322 dissolved. Methacrylic anhydride (MA; Sigma) was added until a concentration of 8% (v/v) of  
MA was achieved. The reaction continued for 3 hr at 60°C under constant stirring. The solution  
324 was then dialyzed against distilled water using 12–14 kDa cutoff dialysis tubing (Spectrum  
Laboratories, Rancho Dominguez, CA, USA) for 7 days at 40°C to remove any unreacted  
326 methacrylic groups from the solution. The GelMA was lyophilized at –80°C in a freeze dryer  
(Freezone, Labonco) for one week to remove the solvent.

328 CNC suspensions were prepared as described previously<sup>26</sup>. The photoinitiator lithium  
phenyl-2,4,6 trimethylbenzoylphosphinate (LAP) was synthesized as described previously<sup>29</sup>.  
330 Freeze dried LAP was dissolved with ASW, and CNC was dispersed in the LAP solution via  
vortexing for about 5 min.

332 **Continuous multilayer 3D bioprinting of bionic coral**

The bionic coral design was developed as an optimization between algal growth rates,  
334 optical performance and the outcome of optical models (Fig. 2, Extended Data Figure 2, 3). The  
final bionic coral was designed in CAD software (Autodesk 3ds Max, Autodesk, Inc, USA) and  
336 was then sliced into hundreds of digital patterns with a custom-written MATLAB program. The  
digital patterns were uploaded to the a digital micromirror device (DMD) in sequential order and  
338 used to selectively expose the prepolymer solution for continuous printing. A 405-nm visible  
LED light panel was used for photopolymerization. A digital micromirror device (DMD)  
340 consisting of 4 million micromirrors modulated the digital mask projected onto the prepolymer  
solution for microscale photopolymerization<sup>27</sup>. The continuous movement of the DMD was  
342 synchronized with the projected digital mask to create smooth 3D constructs that are rapidly  
fabricated without interfacial artifacts. To print the bionic coral, a 2-step printing approach was  
344 developed. In the first step, the PEGDA bio-ink was used to print the coral inspired skeleton. The  
resulting hydrogel was attached to a glass slide surface, washed with DI water and then dried  
346 with an air gun. In the second step, the algal cell-containing bio-ink for tissue printing was then  
injected with a pipette into the skeletal cavities in order to fill the air gaps. The gap-filled skeletal  
348 print was repositioned at the identical spot on the bioprinter, and the bionic coral tissue mask was

loaded. The z-stage was moved such that the surface of the skeletal print touched the glass  
350 surface of the bioprinter.

### Algal stock culture maintenance

352 Two microalgal species were chosen for inclusion in 3D bioprinted polymers:  
dinoflagellates belonging to the genus *Symbiodinium* and the green alga *Marinichlorella kaistiae*.  
354 Stock cultures of *Symbiodinium* strains A08 and A01 (obtained from Mary Coffroth, University  
of Buffalo) were cultured in F/2 medium in a 12h/12h light:dark cycle under an irradiance (400-  
356 700 nm) of 200  $\mu\text{mol photons m}^{-2} \text{s}^{-1}$ . Wild type *M. kaistiae* strain KAS603<sup>19</sup> were obtained from  
Kuehnle AgroSystems, Inc. (Hawaii) and were cultivated at 25°C in artificial seawater (ASW)  
358 medium<sup>30</sup> under continuous light from cool white fluorescent lamps (80  $\mu\text{mol photons m}^{-2} \text{s}^{-1}$ ).  
Stock cultures were harvested during exponential growth phase for use in bioprinting.

### Culturing of bionic coral

360 Bionic corals harboring *Symbiodinium sp.* or *M. kaistiae* KAS603 were cultured under  
362 similar conditions as the respective algal stock cultures (see above). Prior to bioprinting, the bio-  
ink for printing bionic coral tissue constructs was inoculated with cell densities of  $1 \times 10^6$  cells  
364  $\text{mL}^{-1}$  from exponentially growing cultures. We performed growth experiments with 35 bionic  
corals harbouring *M. kaistiae* KAS603. The bionic corals were transferred to 6-well plates filled  
366 with 3 mL of ASW medium<sup>30</sup> containing broadband antibiotics (penicillin/streptomycin, Gibco)  
at a concentration of 1:1000. All prints were illuminated with an incident downwelling irradiance  
368 (400-700 nm) of 80  $\mu\text{mol photons m}^{-2} \text{s}^{-1}$  provided by LED light panels (AL-H36DS, Ray2,  
Finnex) emitting white light. The prints were grown without mixing at 25°C. The ambient  
370 growth medium was replenished at day 5 and day 10. Degradation of GelMA-based tissue  
occurred after about 10-14 days when bacterial abundance was kept low via antibiotic treatment.  
372 Such degradation kinetics can be advantageous for more easy harvesting of the highly  
concentrated microalgae that are contained within the hard PEGDA-based skeleton.

### Optical characterization of bionic coral

374 The angular distribution of transmitted light was measured using an optical goniometer<sup>31</sup>.  
376 The samples were illuminated using a Xenon lamp (Ocean Optics, HPX-2000) coupled into an  
optical fiber (Thorlabs FC-UV100-2-SR). The illumination angle was fixed at normal incidence  
378 and the angular distribution of intensity was acquired by rotating the detector arm with an  
angular resolution of 1°. To detect the signal, a 600  $\mu\text{m}$  core optical glass fiber (Thorlabs FC-

380 UV600-2-SR) connected to a spectrometer (Avantes HS2048) was used. To characterize the  
optical properties, the total transmitted light was measured for different sample thicknesses using  
382 an integrating sphere<sup>31</sup>. The samples were illuminated by a Xenon lamp (Ocean Optics, HPX-  
2000) coupled into an optical fiber (Thorlabs FC-UV100-2-SR), and the transmitted light was  
384 collected with an integrating sphere (Labsphere Inc.) connected to a spectrometer (Avantes  
HS2048). In the case of the skeleton-inspired samples, where the light is scattered multiple times  
386 before being transmitted, the light transport can be described by the so-called diffusion  
approximation<sup>32</sup>. In this regime, the analytical expression, which describes how the total  
388 transmission ( $T$ ) scales with the thickness ( $L$ ) for a slab geometry, is given as<sup>32</sup>:

$$390 \quad T = \frac{1}{l_a} \frac{\sinh\left(\frac{z_e \times l_t}{l_a}\right) \sinh\left(\frac{z_e \times l_t}{l_a}\right)}{\sinh\left(\frac{L + z_e \times l_t}{l_a}\right)} \quad (1)$$

392 where  $l_a$ ,  $l_t$  and  $z_e$  are the absorption length, the transport mean free path and the  
extrapolation length, respectively<sup>33</sup>. Here,  $z_e$  quantifies the effect of internal reflections at the  
394 interfaces of the sample in the estimation of  $l_a$  and  $l_t$ <sup>33</sup>. We quantified  $z_e$  by measuring the angular  
distribution of transmitted light<sup>31</sup>,  $P(\mu)$ , which is related to  $z_e$  by the following equation<sup>34</sup>:

$$396 \quad P(\mu) = \mu \frac{z_e + \mu}{\frac{1}{2} z_e + \frac{1}{3}} \quad (2)$$

where  $\mu$  is the cosine of the transmission angle with respect to the incident ballistic beam. The  
398 theoretical fit is shown in Figure S2C and led to a value of  $z_e = (1.32 \pm 0.12)$ . Once the  
extrapolation length was estimated, the values of  $l_a$  and  $l_t$  could be calculated with Eq. (1)  
400 (Extended Data Figure 2d,e). This was done with an iteration procedure to check the stability of  
the fit, as described previously<sup>35</sup>. In the bionic coral tissue, the scattering strength of the material  
402 is too low and the diffusion approximation cannot be applied. In this regime, the extinction  
coefficient can be estimated using the Beer-Lambert law (Extended Data Figure 2f).

404 The refractive index ( $n$ ) of the bioprinted bionic coral tissue was determined with the  
optical goniometer to characterize the Brewster angle ( $\theta_B$ ). A half circle of the material was



406 printed with a diameter of 2 cm and a thickness of  $z = 5$  mm. The Brewster angle was calculated  
according to Snell's law:

$$408 \quad n = \frac{\sin(\theta_i)}{\sin(\theta_r)} = \frac{\sin(\theta_i)}{\sin(\theta_{90-i})} = \tan(\theta_i) \quad (3)$$

and Brewster's law:

$$410 \quad \theta_B = \arctan \frac{n_2}{n_1} \quad (4)$$

where  $\theta_i$  is the angle of incidence, and  $\theta_r$  is the angle of refraction.  $n_1$  and  $n_2$  are the refractive  
412 indices of the medium and the surrounding medium, respectively. For the coral-inspired tissue  $\theta_B$   
ranged between  $54.0^\circ$  and  $55.0^\circ$  yielding a refractive index of  $n = 1.37$ - $1.40$ .

### 414 **3D Monte Carlo time-of-flight photon propagation modeling**

Tetrahedral meshes were generated via Delaunay triangulation using the MATLAB based  
416 program *Iso2mesh* that calls *cgalmesh*<sup>36</sup>. Meshing was performed with different mesh properties  
varying maximal tetrahedral element volume and Delaunay sphere size in order to optimize  
418 simulation efficiency. Settings were optimized for a Delaunay sphere of 1 ( $10 \mu\text{m}$ ) and a  
tetrahedral element volume of 5 ( $50 \mu\text{m}$ ). Generated tetrahedral meshes were used as source  
420 architecture for a mesh-based 3D Monte-Carlo light transport simulation (*mmclab*)<sup>37</sup>. The model  
uses the generated tetrahedral mesh and calculates photon propagation based on the inherent  
422 optical parameters, the absorption coefficient  $\mu_a$  [ $\text{mm}^{-1}$ ], the scattering coefficient  $\mu_s$  [ $\text{mm}^{-1}$ ], the  
anisotropy of scattering  $g$  [dimensionless] and the refractive index  $n$  [dimensionless]<sup>38</sup>. The  
424 optical parameters were extracted via integrating sphere measurements (see above) and were  
used to calculate time-of-flight photon propagation in the bionic coral. The probe illumination  
426 was a collimated point source with varying source positions.

### **Mechanical properties of bionic tissue**

428 The Young's modulus of the bionic coral tissue was evaluated with a microscale  
mechanical strength tester (Microsquisher, CellScale). Each sample was preconditioned by  
430 compressing at  $4 \mu\text{m s}^{-1}$  to remove hysteresis caused by internal friction. The compression test  
was conducted at 10% strain with a  $2 \mu\text{m s}^{-1}$  strain rate. Cylindrical constructs were 3D printed  
432 using the same bio-ink as used to print bionic coral tissue. The Young's modulus was calculated

from the linear region of the stress–strain curve<sup>27</sup>. Three samples were tested, and each sample  
434 was compressed three times.

### **Cell counts and productivity estimates**

436 Cell density was determined at the beginning of the experiment (day 0) and then at day 3,  
day 6, day 10 and day 12 of the growth experiments. To determine cell density, the construct was  
438 removed from the growth medium, and any remaining solution attached to the construct was  
removed with a Kimwipe. Each construct was transferred to a 1.5 mL microfuge tube and the  
440 hydrogel was dissolved via adding 600  $\mu$ L trypsin solution (0.25% Trypsin/EDTA) under  
incubation at 37 °C for 40 min. This procedure removed the microalgal cells from the matrix  
442 allowing for cell counting via a haemocytometer<sup>24</sup>. The accuracy of this approach was verified  
by printing known cell densities (from liquid culture) and comparing it to the trypsin-based  
444 estimates yielding a deviation of < 3%. To additionally compare our cell density estimates with  
ash free dry weight (AFDW) of algal cell biomass [g], which is a commonly used metric in  
446 biofuels research, we determined AFDW using methods described previously<sup>39</sup>. AFDW was on  
average  $3.47 \times 10^{-11}$  g cell<sup>-1</sup> ( $\pm 4.6 \times 10^{-13}$  SE). The maximal growth rate was obtained from  
448 readings of Day10 and Day12, yielding  $1.47 \times 10^{11}$  cells L<sup>-1</sup> day<sup>-1</sup> or 5.1 g L<sup>-1</sup> day<sup>-1</sup>. The aerial  
productivity was extrapolated to g m<sup>-2</sup> day<sup>-1</sup> by accounting for the area occupied by one bionic  
450 coral (6mm in length and width) and the measured productivity per bionic coral. Raceway ponds  
typically have a depth of 20-30 cm compared to 2 mm thickness in our system<sup>21,22</sup>.

### **O<sub>2</sub> microsensor measurements**

452 Clark-type O<sub>2</sub> microsensors (tip size =25  $\mu$ m, response time < 0.2 s; OX-25 FAST,  
454 Unisense, Aarhus, Denmark) were used to characterize photosynthetic performance of the bionic  
corals. Net photosynthesis was measured via linear O<sub>2</sub> profiles measured with O<sub>2</sub> microsensors  
456 from the surface into the overlying diffusive boundary layer<sup>2</sup>. The sensors were operated via a  
motorized micromanipulator (Pyroscience, Germany). The diffusive O<sub>2</sub> flux was calculated via  
458 Fick's first law of diffusion for a water temperature = 25°C and salinity = 30 using a molecular  
diffusion coefficient for O<sub>2</sub> =  $2.255 \times 10^{-5}$  cm<sup>2</sup> s<sup>-1</sup>(<sup>2</sup>). Gross photosynthesis was estimated via the  
460 light-dark shift method<sup>41</sup>. A flow chamber set-up provided slow laminar flow (flow rate = 0.5 cm  
s<sup>-1</sup>) and a fiber-optic halogen lamp (Schott KL2500, Schott, Germany) provided white light at  
462 defined levels of incident irradiance (400-700 nm) (0, 110, 220, and 1200  $\mu$ mol photons m<sup>-2</sup> s<sup>-1</sup>)<sup>2</sup>.  
Photosynthesis-irradiance curves were fitted to an exponential function<sup>42</sup>.

464 **Fiber-optic microsensors**

466 The fluence rate (= scalar irradiance),  $E_0$ , within the bionic coral was measured using  
468 fiber-optic scalar irradiance microsensors with a tip size of 60-80  $\mu\text{m}$  and an isotropic angular  
470 response to incident light of  $\pm 5\%$  (Zenzor, Denmark). Fluence rate measurements were  
performed through the tissue at a vertical step size of 100  $\mu\text{m}$  using an automated microsensor  
profiler set-up as described previously<sup>2</sup>. Fluence rate was normalized to the incident  
downwelling irradiance,  $E_d$ , measured with the scalar irradiance sensor placed over a black light  
well at identical distance and placement in the light field as the surface of bioprinted constructs.

472 **Scanning electron microscopy (SEM)**

SEM images were taken with a Zeiss Sigma 500 scanning electron microscope. Samples  
474 were prepared in two different ways. To image the bionic coral skeleton made of PEGDA,  
samples were dried at room temperature and sputter coated with iridium (Emitech K575X  
476 Sputter Coater). To image the bionic coral tissue made of GelMA, samples were snap frozen  
with liquid nitrogen, and were then lyophilized in a freeze dryer (Freezone, Labonco) for 3 days.  
478 The overall shape could not be maintained, but microscale structures (such as micropores of  
GelMA) were well preserved. The samples were sputter coated with iridium (Emitech K575X  
480 Sputter Coater) prior to imaging on the SEM.

**Confocal laser scanning microscopy (CLSM)**

482 To characterize microalgal aggregate size and distribution in 3D, a confocal laser scan  
microscope was used (Nikon Eclipse TE-2000U). Bionic corals were placed on a cover glass and  
484 imaged from below with a 641 nm laser. Confocal stacks of chlorophyll *a* fluorescence were  
acquired using a pinhole size of 1.2  $\mu\text{m}$ , a vertical step size for z-stacking = 1  $\mu\text{m}$ , and a x,y  
486 resolution of 0.6  $\mu\text{m}$ . Particle segmentation and visualization of the data was performed in  
ImageJ and the NIS confocal elements software (Nikon). Particle segmentation was performed  
488 via manual thresholding of 229-4095 gray scale values, with a cleaning factor of 6x (this  
eliminates smaller particles that are not aggregates), hole filling and a smoothing factor of 2x.  
490 The segmented particles were analysed for surface area, volume and particle density per volume.

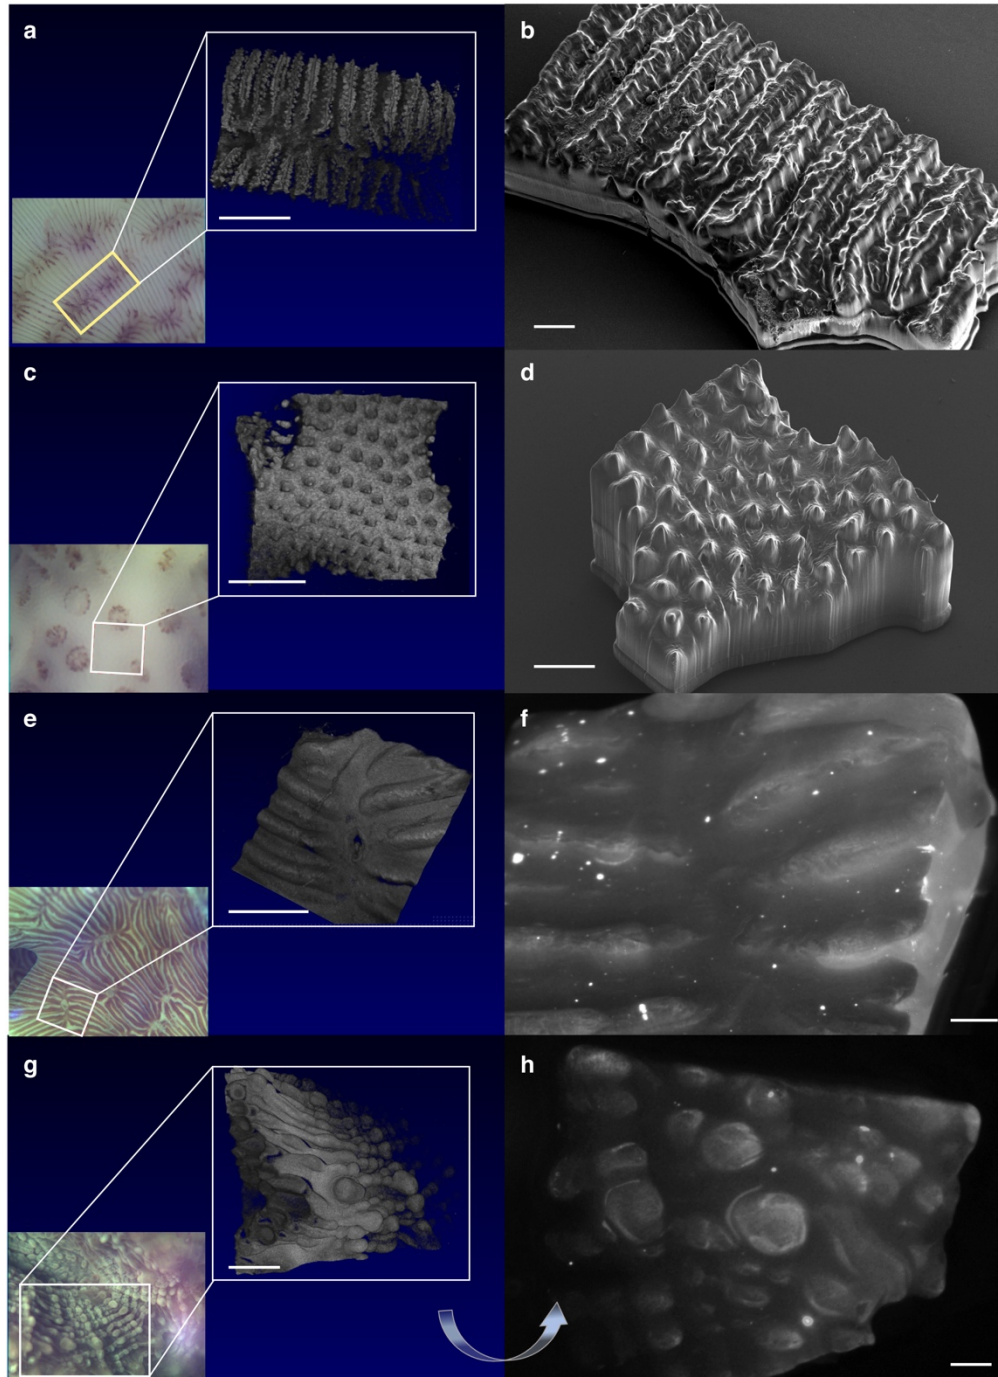

492 **Extended data Figure 1. Microtopography of corals and 3D bioprinted bionic corals.**  
494 Skeleton of *Pavona cactus* (a, b) and *Pocillopora damicornis* (c, d) as well as tissue surface of  
496 *Pavona cactus* (e, f) and *Favites flexuosa* (g, h). USB camera images and respective optical  
498 coherence tomography scans of natural corals (a, c, e, g) and 3D printed replica (b, d, f, h).  
Skeletal 3D printed constructs were imaged with an environmental SEM, while 3D printed tissue  
constructs were photographed with a microscope camera. Scale bar = 1mm (a, b, d, e, g) and 500  
 $\mu\text{m}$  (c, f, h).

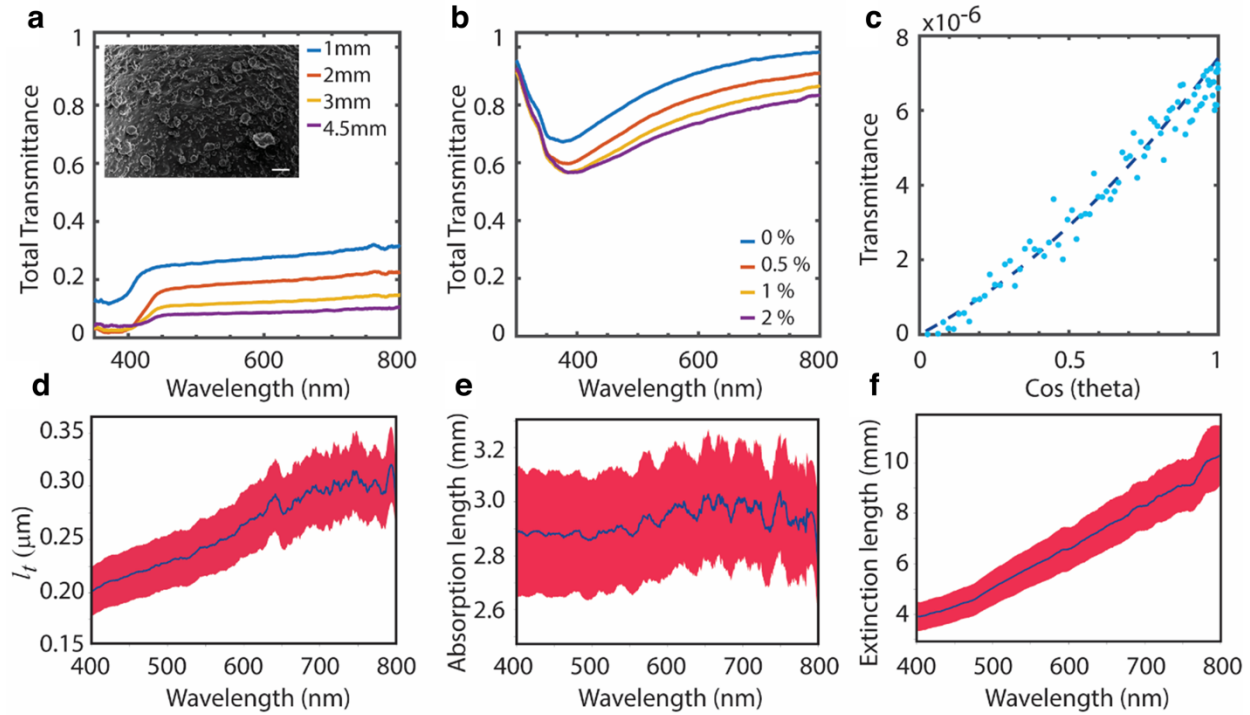

500

**Extended data Figure 2. Optical characterization of 3D printed constructs.** Total

502

transmittance of bionic skeleton with 7% CNC concentration for different slab thicknesses (1-4.5mm) (a). The high CNC density yields a rough surface (see SEM image in inlet, scale bar =

504

40  $\mu\text{m}$ ). Total transmittance of bionic coral tissue doped with different concentrations of CNC (0-2%) (b). Fitting of extrapolation length ( $z_e$ ) for bionic skeleton according to Eq. 2 based on

506

the angular distribution of transmitted light (c). Calculated transport mean free path ( $l_t$ ,  $\mu\text{m}$ ) (d)

508

and absorption length ( $l_a$ , mm) for bionic skeleton (mean  $\pm$  CI) (e). Extinction length for bionic tissue estimated using Beer-Lambert law (mean  $\pm$  CI) (f).

510

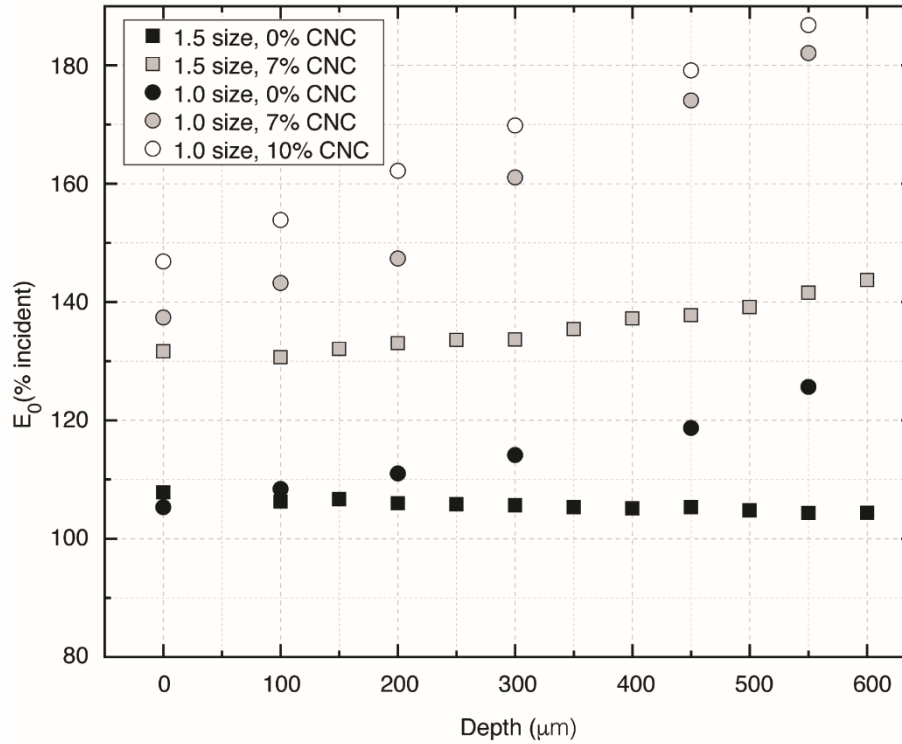

512 **Extended data Figure 3. Effect of CNC doping and corallite cup size on fluence rate ( $E_0$ )**  
513 **attenuation.** Measurements were performed for different CNC concentrations (0-10%) using the  
514 original corallite cup size (maximal width = 1 mm) and a 1.5-fold enhanced size.  $E_0$  (fluence  
515 rate) was normalized to the vertically incident downwelling irradiance  $E_d$ .

516

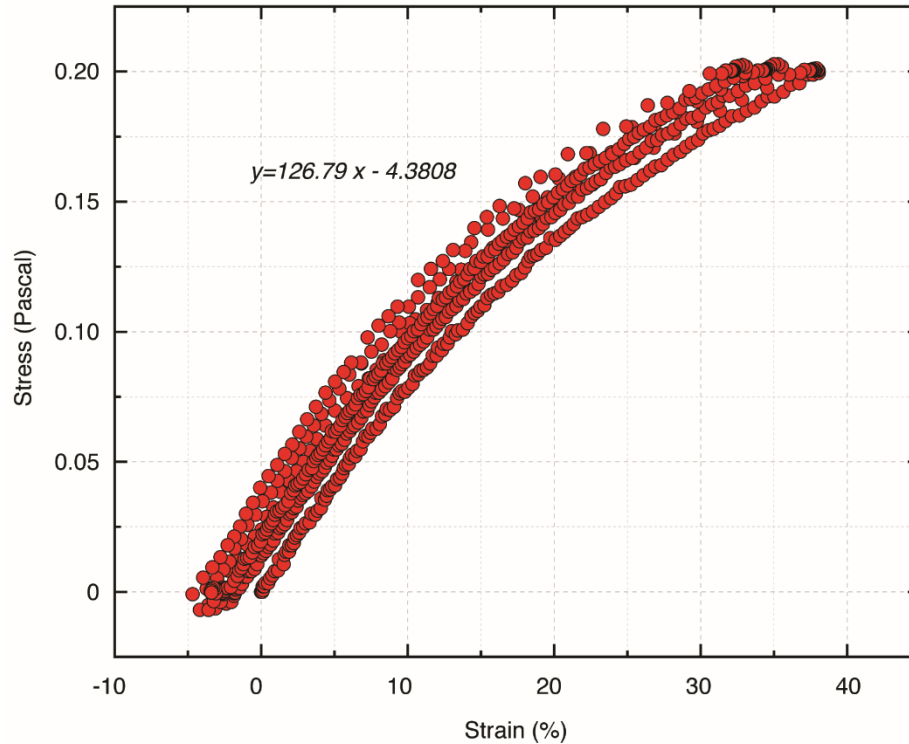

518 **Extended data Figure 4. Stress-strain analysis of coral-inspired bionic tissue.** Replicate  
measurements of 6 bionic tissues were performed. The average elastic modulus was  $E = 4.3$  kPa.

520

**Acknowledgments** We thank Martin Tresguerres, Jennifer Smith, Qianqian Fang, Bryan Zhu, Debra Quick Jones,  
522 Haixu Shen, Jeffrey Alido, and Tressa Smalley for help with experimental and analytical work. Image credit in Fig.  
1A is given to Gianfranco Rossi. Funding: This study was funded by the European Union's Horizon 2020 research  
524 and innovation programme (702911-BioMIC-FUEL, DW), the European Research Council (ERC-2014-STG H2020  
639088, SV), the David Phillips fellowship (SV), the National Institutes of Health (R21HD090662 and  
526 R01EB021857; SC), the National Science Foundation (1644967; SC), the Carlsberg Foundation (DW, MK), and the  
Villum Foundation (00023073; MK).

**Author contributions** conceptualized the study: DW, SV, DDD, MH, AS, MD; developed 3D printing approach:  
528 DW, SY, SC; developed optical model and characterized optical properties: DW, GI, SV; designed and performed  
cultivation experiments: DW, OG; performed imaging: DW, SY; provided materials: SC, FA, MK, SV, DDD; DW.  
530 All authors critically assessed the results and wrote the manuscript. Competing interests: The authors declare no  
532 competing interests. Data and materials availability: All data are available in the main text or the supplementary  
materials.

534
